1 **Post lockdown COVID-19 seroprevalence and circulation at the time of**  
2 **delivery, France**

3 **Running title**

4 COVID-19 seroprevalence & childbirth

5

6 Jérémie Mattern<sup>1</sup> (MD), Christelle Vauloup-Fellous<sup>2</sup> (PD, PhD), Hoda Zakaria<sup>1</sup> (MD),  
7 Alexandra Benachi<sup>1</sup> (MD, PhD), Julie Carrara<sup>1</sup> (MD), Alexandra Letourneau<sup>1</sup> (MD), Nadège  
8 Bourgeois-Nicolaos<sup>3</sup> (PD, PhD), Daniele De Luca<sup>4</sup> (MD, PhD), Florence Doucet-Populaire<sup>3</sup>  
9 (MD, PhD), Alexandre J. Vivanti<sup>1,\*</sup> (MD, PhD)

10

11 1. Division of Obstetrics and Gynecology, Antoine Béclère Hospital, Paris Saclay

12 University, AP-HP, Clamart, France

13 2. Division of Virology, Paul Brousse Hospital, Paris Saclay University, AP-HP, INSERM

14 U1193 Villejuif, France

15 3. Division of Microbiology, Antoine Béclère Hospital, Paris Saclay University, AP-HP,

16 Clamart, France

17 4. Division of Pediatrics and Neonatal Critical Care, Antoine Béclère Hospital, Paris Saclay

18 University, AP-HP, Clamart, France

19

20 \* Corresponding author

21 Alexandre J. Vivanti, Service de Gynécologie-Obstétrique

22 Ho

pital A. Béclère, GHU Paris Saclay, APHP.

23 157 rue de la Porte de Trivaux

24 92140 Clamart, France

25 Tel: +33 (0)145374441 - Fax: +33 (0)145374366 - Email: [alexandre.vivanti@aphp.fr](mailto:alexandre.vivanti@aphp.fr)

26

27 **Abstract**

28

29 **Background**

30

31 To fight the COVID-19 pandemic, lockdown has been decreed in many countries worldwide.  
32 The impact of pregnancy as a severity risk factor is still debated, but strict lockdown measures  
33 have been recommended for pregnant women.

34

35 **Objectives**

36

37 To evaluate the impact of the COVID-19 pandemic and lockdown on the seroprevalence and  
38 circulation of SARS-CoV-2 in a maternity ward in an area that has been significantly affected  
39 by the virus.

40

41 **Study design**

42

43 Prospective study at the Antoine Bécélère Hospital maternity ward (Paris area, France) from  
44 May 4 (one week before the end of lockdown) to May 31, 2020 (three weeks after the end of  
45 lockdown). All patients admitted to the delivery room during this period were offered a  
46 SARS-CoV-2 serology test as well concomitant SARS-CoV-2 RT-PCR on a nasopharyngeal  
47 sample.

48

49 **Results**

50

51 A total of 249 women were included. Seroprevalence of SARS-CoV-2 was 8%. The RT-PCR  
52 positive rate was 0.5%. 47.4% of the SARS-CoV-2-IgG-positive pregnant women never  
53 experienced any symptoms. A history of symptoms during the epidemic, such as fever,  
54 myalgia and anosmia, was suggestive of previous infection.

55

56 **Conclusions**

57

58 Three weeks after the end of lockdown, SARS-CoV-2 infections were scarce in our region. A  
59 high proportion of SARS-CoV-2-IgG-negative pregnant women must be taken into  
60 consideration in the event of a resurgence of the pandemic in order to adapt public health  
61 measures to reduce exposure to the virus, such as social distancing and teleworking for this  
62 specific population.

63

64

65

66

67 **Introduction**

68

69 The coronavirus disease 2019 (COVID-19) pandemic hit France at the end of  
70 February 2020. To date (June 15, 2020), more than 7,000,000 cases and 400,000 deaths have  
71 occurred worldwide.[1] France, and more particularly the Paris area, was one of the regions of  
72 the world most affected by the pandemic. In order to slow down progression of the pandemic,  
73 lockdown has been decreed in many countries worldwide. French lockdown started on March  
74 17, 2020, and ended on May 11, 2020.

75

76 Pregnancy as a severity risk factor of severe acute respiratory syndrome coronavirus 2  
77 (SARS-CoV-2) infection is still debated, even though the third trimester seems to be a  
78 consensual risk factor[2–7]. The main goal of this study was to evaluate the impact of the first  
79 wave of the COVID-19 pandemic in our region and the effect of lockdown on seroprevalence  
80 in our maternity ward, which has been significantly affected by the virus (more than 40  
81 confirmed infections among pregnant women between March 12 and April 20).

## 82 **Materials and Methods**

83

84 We conducted a prospective study at the Antoine Bécclère Hospital maternity ward  
85 (Paris area, France) from May 4 (one week before the end of lockdown) to May 31, 2020  
86 (three weeks after the end of lockdown). All patients admitted to the delivery room during  
87 this period were offered a SARS-CoV-2 serology test as well as SARS-CoV-2 RT-PCR on a  
88 nasopharyngeal sample. A questionnaire was distributed to all included women, who were  
89 asked about symptoms (fever, cough, dyspnea, myalgia, anosmia, diarrhea and rash) affecting  
90 them and/or close relatives (household residents) from January 1 to their delivery, and if there  
91 were symptoms they were asked for the date of onset. Patients were also asked whether they  
92 strictly adhered to the rules of lockdown and social distancing.

93

### 94 Serology testing

95 Serum samples were run on the Abbott Architect instrument using the Abbott SARS-  
96 CoV-2 IgG assay (Abbott, Sligo, Ireland) following the manufacturer's instructions. The  
97 assay is a chemiluminescent microparticle immunoassay for detection in human serum or  
98 plasma of IgG against the SARS-CoV-2 nucleocapsid protein. Based on our local evaluation  
99 of 500 serum samples (data not published), the result was considered negative if the IgG  
100 index value was  $< 0.8$ , equivocal if the IgG index was between 0.8 and 1.39, and positive if  
101 the IgG index value was  $\geq 1.40$  (0.40 is the Abbott determined positivity cut-off).

102

### 103 Molecular testing

104 Nasopharyngeal swabs were collected from all the patients. Samples were tested by  
105 using the GeneFinder™ COVID-19 Plus RealAmp Kit on the ELITE InGenius® Platform, or

106 the Xpert Xpress SARS-CoV-2 assay (Cepheid), or the GenMark ePlex SARS-CoV-2 assay,  
107 depending on the time of day.

108 The GeneFinder assay is a molecular in vitro test utilizing one-step reverse transcription real-  
109 time PCR to detect the RNA-dependent RNA polymerase, the envelope gene (E) and the  
110 nucleocapsid gene (N), as described in international guidelines (Corman *et al.*[8])

111 The Xpert Xpress SARS-CoV-2 assay (Cepheid) and the GenMark ePlex SARS-CoV-  
112 2 assay are sample-to-answer molecular diagnostic platforms. The former is based on the  
113 detection of 2 gene targets, N2 and E, according to an algorithm in parallel with the sample  
114 process control, and the latter is based on the detection of the N gene of SARS-CoV-2.

115

116 All data (clinical, laboratory, from both mothers and newborns) were prospectively  
117 collected from medical records.

118

119 All statistical analyses were performed using R software (Version 3.5.1, R Core Team  
120 [2018] <https://www.R-project.org/>). Continuous variables are expressed as medians with  
121 interquartile range (IQR). Categorical variables are expressed as numbers with percentages. A  
122 two-tailed Mann-Whitney U test was used for statistical analysis of continuous variables.

123 Fisher's exact test was used for statistical analysis of categorical variables. Statistical

124 significance was considered with a  $p < 0.05$ .

125

126 This study was approved by the institutional review board of the French College of  
127 Obstetricians and Gynecologists (2020-OBST-0408) and was performed in accordance with  
128 the Declaration of Helsinki. All patients gave written consent. All data were de-identified to  
129 ensure patient privacy and confidentiality.

130

131

132 **Results**

133

134 During the study period, SARS-CoV-2 serology testing was offered to all 272 patients  
135 admitted to the delivery room (figure 1). A total of 249 (91.5%) serology results were  
136 available (22 women did not give consent and one missing result). Seroprevalence was 8%  
137 (n=20/249). The main characteristics of the women and of their pregnancies and newborns are  
138 shown in Table 1. All patients were asymptomatic on admission to the delivery room. There  
139 were no significant differences between the groups of SARS-CoV-2-IgG-positive and SARS-  
140 CoV-2-IgG-negative women. Among women admitted for delivery, 190 had a SARS-CoV-2  
141 RT-PCR test during the study period (59 women declined testing and one missing result).  
142 Exhaustivity was therefore of 69.9% (190/272). Only one (0.5%) test was positive and this  
143 patient remained asymptomatic during delivery and early post-partum. This positive test was  
144 performed on May 25, 2020, using the Xpert Xpress assay, with detection of the N2 gene at a  
145 CT value of 41.4, which corresponds to a very low viral load, which may be related to an old  
146 infection. The serology was positive. The patient and her spouse reported symptoms such as  
147 headache, asthenia and anosmia as of March 10, 2020. Her newborn tested negative (negative  
148 SARS-CoV-2 RT-PCR performed on nasopharyngeal swabs at birth and at three days of life).

149

150

151 **Figure 1: Flow chart of the study – Universal serology screening for SARS-CoV-2**  
152 **among a cohort of women admitted for delivery**

153

| <b>Table 1: Maternal, obstetric and neonatal characteristics according to SARS-CoV-2 serological status for women admitted for delivery</b> |                               |                              |             |
|---------------------------------------------------------------------------------------------------------------------------------------------|-------------------------------|------------------------------|-------------|
|                                                                                                                                             | <b>IgG-negative<br/>n=229</b> | <b>IgG-positive<br/>n=20</b> | <b>p</b>    |
| <b>Age, years, median [IQR]</b>                                                                                                             | <b>33 [29-36]</b>             | <b>31 [30.5-37]</b>          | <b>0.88</b> |

|                                                |                  |                  |      |
|------------------------------------------------|------------------|------------------|------|
| Nullipara, n (%)                               | 106 (46.3)       | 12 (60)          | 0.25 |
| BMI, kg/m <sup>2</sup> , median [IQR]          | 23 [21-27]       | 25,5 [23-28.2]   | 0.07 |
| History of preexisting:                        |                  |                  |      |
| - Diabetes mellitus, n (%)                     | 2 (0.9)          | 0 (0)            | 1    |
| - Chronic hypertension, n (%)                  | 6 (2.6)          | 0 (0)            | 1    |
| - Tobacco use, n (%)                           | 44 (19.2)        | 2 (10.6)         | 0.54 |
| - Asthma, n (%)                                | 13 (5.7)         | 0 (0)            | 0.6  |
|                                                |                  |                  |      |
| Gestational age at delivery, week median [IQR] | 39.6 [38.2-40.7] | 39.7 [38.2-40.3] | 0.50 |
| Delivery before 37 WG, n (%)                   | 26 (11.4)        | 4 (21.1)         | 0.26 |
| Birthweight, g median [IQR]                    | 3241 [2829-3585] | 3213 [2853-3471] | 0.62 |
| Infected neonates, n (%)                       | 0 (0)            | 0 (0)            |      |

154

155

156 Analysis of the available questionnaires (n=220/249; 88.3%) showed that 47.4%  
 157 (9/19) of the SARS-CoV-2-IgG-positive women reported being asymptomatic throughout the  
 158 first wave of the pandemic. SARS-CoV-2-IgG-positive women reported more symptoms  
 159 compared to SARS-CoV-2-IgG-negative women (Table 2), such as fever (n=3 (15.8%) versus  
 160 n=3 (1.5%); OR=12.9 (95% CI 1.49-97.52) ; p=0.009), myalgia (n=7 (36.8%) versus n=14  
 161 (7%); OR=8.39 (95% CI 2.38-25.46); p<0.001) and anosmia (n=6 (31.6%) versus n=3  
 162 (1.5%); OR=29.2 (95% CI 5.52-201); p<0.001). There was no difference regarding the  
 163 symptoms of cough, dyspnea, diarrhea and rash. All women except one reported they had  
 164 strictly respected lockdown rules.

165

166

|                | IgG-negative<br>n=201 | IgG-positive<br>n=19 | OR (95% CI)          | p     |
|----------------|-----------------------|----------------------|----------------------|-------|
| Fever, n (%)   | 3 (1.5)               | 3 (15.8)             | OR=12.9 (1.49-97.52) | 0.009 |
| Cough, n (%)   | 13 (6.5)              | 2 (10.5)             | OR=1.69 (0.17-8.52)  | 0.62  |
| Dyspnea, n (%) | 12 (6)                | 1 (5.3)              | OR=0.87 (0.02-6.6)   | 1     |

|                 |           |          |                      |        |
|-----------------|-----------|----------|----------------------|--------|
| Myalgia, n (%)  | 14 (7)    | 7 (36.8) | OR=8.39 (2.19-25.46) | <0.001 |
| Anosmia, n (%)  | 3 (1.5)   | 6 (31.6) | OR=29,2 (5.52-201)   | <0.001 |
| Diarrhea, n (%) | 21 (10.4) | 1 (5.3)  | OR=0.47 (0.01-3.34)  | 0,7    |
| Rash, n (%)     | 5 (2.5)   | 1 (5.3)  | OR=2.16 (0.04-20.9)  | 0.42   |

167



168 **Discussion**

169

170 SARS-CoV-2 screening (serology and RT-PCR on nasopharyngeal secretions) of all  
171 women at delivery showed that: 1- the seroprevalence of SARS-CoV-2 infection was 8% and  
172 most of the pregnant women remained uninfected; 2- half of the SARS-CoV-2-IgG-positive  
173 pregnant women were completely asymptomatic; 3- the virus was no longer circulating up to  
174 three weeks after the end of the lockdown.

175

176 In our maternity ward, implementation and generalized respect of lockdown rules and  
177 social distancing allowed for a drastic reduction in the number of confirmed cases. Pregnant  
178 women reported full lockdown compliance from March 17, 2020 until delivery. Despite the  
179 end of lockdown and the resumption of activity for members of the family circle, the rate of  
180 positive results by RT-PCR remained very low. In addition, reported symptoms such as fever,  
181 myalgia and anosmia were linked with previous infection with the SARS-CoV-2 virus.

182

183 The seroprevalence of our cohort was similar to that recently observed in the general  
184 population[9,10]. To date, it has not been assessed whether SARS-CoV-IgG, detected with  
185 currently available ELISA assays, are neutralizing antibodies and consequently confer  
186 protection. However, it is of major importance to have an estimation of the rate of pregnant  
187 women who have not already been infected, in order to implement adapted measures in the  
188 event of a second outbreak, such as social distancing and teleworking at least for this specific  
189 population [11,12].

190

191 One could argue that the study period would need to be longer in order to fully  
192 estimate the effect of the end of the lockdown and the risk of a resumption of the pandemic

193 (so-called second wave). However, we believe that our study provides an important snapshot

194 at a given point in time of the exposure to COVID-19 in an at-risk population in a region

195 highly exposed to the virus.

196

197 **Acknowledgments**

198 We would like to thank David Marsh for language editing.

199

200 **Conflict of interests**

201 None

202

203 **Funding**

204 None

205

206

207

208

209

210

211

212

213

214

215 **References**

216

- 217 1. [https://www.who.int/docs/default-source/coronaviruse/situation-reports/20200609-](https://www.who.int/docs/default-source/coronaviruse/situation-reports/20200609-covid-19-sitrep-141.pdf?sfvrsn=72fa1b16_2)  
218 [covid-19-sitrep-141.pdf?sfvrsn=72fa1b16\\_2](https://www.who.int/docs/default-source/coronaviruse/situation-reports/20200609-covid-19-sitrep-141.pdf?sfvrsn=72fa1b16_2).
- 219 2. Yin M, Zhang L, Deng G, Han C, Shen M, Sun H, et al. Severe Acute Respiratory  
220 Syndrome Coronavirus 2 (SARS-CoV-2) Infection During Pregnancy In China: A  
221 Retrospective Cohort Study. medRxiv. 2020; 2020.04.07.20053744.  
222 doi:10.1101/2020.04.07.20053744
- 223 3. Wei L, Jing W, Wenbin L, Zhaoxian Z, Siying L, Zhihui R. Clinical characteristics of 19  
224 neonates born to mothers with COVID-19. *Frontiers of Medicine*. doi:10.1007/s11684-  
225 020-0772-y
- 226 4. Liu D, Li L, Wu X, Zheng D, Wang J, Yang L, et al. Pregnancy and Perinatal Outcomes  
227 of Women With Coronavirus Disease (COVID-19) Pneumonia: A Preliminary Analysis.  
228 *American Journal of Roentgenology*. 2020; 1–6. doi:10.2214/AJR.20.23072
- 229 5. Hantoushzadeh S, Shamshirsaz AA, Aleyasin A, Seferovic MD, Aski SK, Arian SE, et  
230 al. Maternal Death Due to COVID-19 Disease. *Am J Obstet Gynecol*. 2020.  
231 doi:10.1016/j.ajog.2020.04.030
- 232 6. Vivanti AJ, Mattern J, Vauloup-Fellous C, Jani J, Rigonnot L, El Hachem L, et al.  
233 Retrospective description of 100 pregnant women with SARS-CoV-2 infection, France.  
234 *Emerg Infect Dis*. 2020.
- 235 7. Sentilhes L, De Marcillac F, Jouffrieau C, Kuhn P, Thuet V, Hansmann Y, et al.  
236 COVID-19 in pregnancy was associated with maternal morbidity and preterm birth. *Am*  
237 *J Obstet Gynecol*. 2020. doi:10.1016/j.ajog.2020.06.022
- 238 8. Corman VM, Landt O, Kaiser M, Molenkamp R, Meijer A, Chu DK, et al. Detection of  
239 2019 novel coronavirus (2019-nCoV) by real-time RT-PCR. *Euro Surveill*. 2020;25.  
240 doi:10.2807/1560-7917.ES.2020.25.3.2000045
- 241 9. Stringhini S, Wisniak A, Piumatti G, Azman AS, Lauer SA, Baysson H, et al.  
242 Seroprevalence of anti-SARS-CoV-2 IgG antibodies in Geneva, Switzerland  
243 (SEROCoV-POP): a population-based study. *The Lancet*. 2020; S0140673620313040.  
244 doi:10.1016/S0140-6736(20)31304-0
- 245 10. Sood N, Simon P, Ebner P, Eichner D, Reynolds J, Bendavid E, et al. Seroprevalence of  
246 SARS-CoV-2–Specific Antibodies Among Adults in Los Angeles County, California,  
247 on April 10–11, 2020. *JAMA*. 2020;323: 2425–2427. doi:10.1001/jama.2020.8279
- 248 11. CDC. COVID-19 Serology Surveillance Strategy. In: Centers for Disease Control and  
249 Prevention [Internet]. 11 Feb 2020 [cited 17 Jun 2020]. Available:  
250 [https://www.cdc.gov/coronavirus/2019-ncov/covid-data/serology-](https://www.cdc.gov/coronavirus/2019-ncov/covid-data/serology-surveillance/index.html)  
251 [surveillance/index.html](https://www.cdc.gov/coronavirus/2019-ncov/covid-data/serology-surveillance/index.html)
- 252 12. Vivanti AJ, Deruelle P, Picone O, Guillaume S, Roze J-C, Mulin B, et al. Follow-up for  
253 pregnant women during the COVID-19 pandemic: French national authority for health

254 recommendations. Journal of Gynecology Obstetrics and Human Reproduction. 2020;  
255 101804. doi:10.1016/j.jogoh.2020.101804

256
